# Supplementary material for: Treatment of Chrysanthemum Synthetic Seeds by Air SDBD Plasma
Source: MDPI journal article supplement (doi:10.3390/plants11070907), 2022-03-29
Supplement: s1 [file s1]

## Supplementary data S1- Treatment of chrysanthemum synthetic seeds by air SDBD plasma

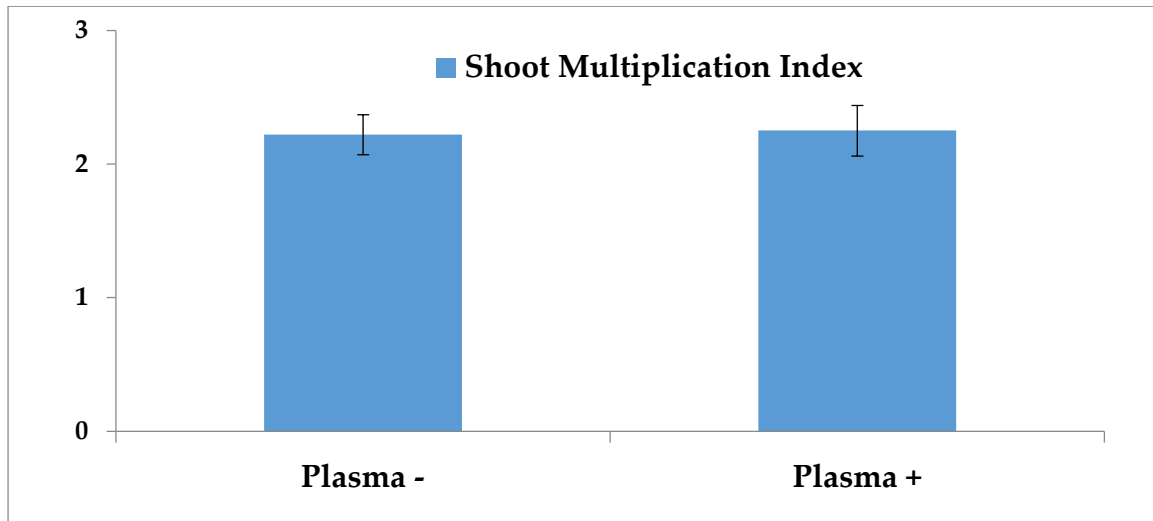

**Figure S1.** Shoot multiplication index in a control untreated (plasma -) and plasma-treated synseeds (plasma +).
